# Supplementary material for: Alkaloids Used as Medicines: Structural Phytochemistry Meets Biodiversity—An Update and Forward Look
Source: PubMed Central journal article supplement (PMC8036335; doi:10.3390/molecules26071836), 2021-03-25
Supplement: molecules-26-01836-s001.pdf [file molecules-26-01836-s001.pdf]

## The abundance of alkaloids-containing species and its therapeutic investigation

### *Supplementary information*

Supplementary Table 1: Top 25 species listed in GBIF based on biodiversity occurrences. Identified alkaloids are extracted from Dictionary of Natural Products (DNP) and medicinal/food uses are provided by PFAF Plants for a future database 2020 about specific species.

| Species                             | Occurrences | Identified Alkaloids | Selected medicinal and food uses                                                            |
|-------------------------------------|-------------|----------------------|---------------------------------------------------------------------------------------------|
| <i>Triticum aestivum</i> L.         | 858198      | 5                    | Food uses; antipyretic, sedative, antihidrotic, improve female fertility                    |
| <i>Trifolium repens</i> L.          | 815131      | 2                    | Treatment of coughs, colds, fevers and leucorrhoea                                          |
| <i>Achillea millefolium</i> L.      | 814224      | 8                    | Tonic, anti-inflammatory, anti-spasmodic, diaphoretic                                       |
| <i>Hedera helix</i> L.              | 603279      | 1                    | Antibacterial, emetic, vasodilator                                                          |
| <i>Corylus avellana</i> L.          | 600108      | 3                    | Food use; astringent, diaphoretic, febrifuge, nutritive and odontalgic                      |
| <i>Fagus sylvatica</i> L.           | 586202      | 2                    | antacid, antipyretic, antiseptic, antitussive, expectorant, odontalgic                      |
| <i>Pinus sylvestris</i> L.          | 583687      | 1                    | antiseptic, diuretic and expectorant                                                        |
| <i>Calystegia sepium</i> (L.) R.Br. | 581166      | 3                    | demulcent, diuretic, febrifuge, poultice and strongly purgative                             |
| <i>Galium aparine</i> L.            | 522214      | 3                    | Diuretic, antiphlogistic, aperient, diaphoretic, diuretic, febrifuge                        |
| <i>Daucus carota</i> L.             | 511657      | 3                    | Food; anthelmintic, carminative, deobstruent, diuretic, galactogogue, ophthalmic, stimulant |
| <i>Lolium perenne</i> L.            | 510788      | 7                    | Diarrhoea, haemorrhages and malaria                                                         |
| <i>Sambucus nigra</i> L.            | 495020      | 6                    | diaphoretic, diuretic, expectorant and haemostatic                                          |
| <i>Picea abies</i> (L.)H.Karst.     | 466427      | 6                    | antibiotic, antiseptic, balsamic, expectorant, sedative                                     |
| <i>Equisetum arvense</i> L.         | 444940      | 2                    | anodyne, antihemorrhagic, antiseptic, astringent, carminative, diaphoretic,                 |

|                                   |        |    |                                                                                                                                             |
|-----------------------------------|--------|----|---------------------------------------------------------------------------------------------------------------------------------------------|
|                                   |        |    | diuretic, galactagogue, haemostatic and vulnerary                                                                                           |
| <i>Phalaris arundinacea</i> L.    | 426049 | 4  | None                                                                                                                                        |
| <i>Rosmarinus officinalis</i> L.  | 414732 | 1  | Antiseptic, anti-inflammatory, antioxidant                                                                                                  |
| <i>Hordeum vulgare</i> L.         | 404700 | 9  | Food use; demulcent, expectorant, galactofuge, lenitive and stomachic                                                                       |
| <i>Vaccinium myrtillus</i> L.     | 399725 | 2  | astringent, diuretic, tonic and an antiseptic for the urinary tract                                                                         |
| <i>Pteridium aquilinum</i> L.     | 397816 | 1  | antiemetic, antiseptic, appetizer and tonic                                                                                                 |
| <i>Rumex obtusifolius</i> L.      | 392169 | 1  | treatment of jaundice, whooping cough, boils and bleeding                                                                                   |
| <i>Capsella bursa-pastoris</i> L. | 371251 | 2  | antiscorbutic, astringent, diuretic, emmenagogue, haemostatic, hypotensive, oxytocic, stimulant, vasoconstrictor, vasodilator and vulnerary |
| <i>Oryza sativa</i> L.            | 368796 | 17 | diuretic, reduces lactation, improves digestion and controls sweating                                                                       |
| <i>Vicia sativa</i> L.            | 362968 | 15 | treat eczema and other skin irritations, and as an antiseptic                                                                               |
| <i>Zea mays</i> L.                | 355260 | 32 | cholagogue, demulcent, diuretic, lithontripic, mildly stimulant and vasodilator                                                             |
| <i>Rubus idaeus</i> L.            | 346607 | 1  | Food use; anti-inflammatory, astringent, decongestant, ophthalmic, oxytocic and stimulant                                                   |
